# Supplementary material for: Reversible light-induced spin state switching in a dinuclear Fe(ii) spin crossover complex
Source: Royal Society of Chemistry journal article supplement (doi:10.1039/d3dt02691d), 2024-01-01
Supplement: d3dt02691d1.pdf [file d3dt02691d1.pdf]

## **Reversible Light-Induced Spin State Switching in a Dinuclear Fe(II)**

### **Spin Crossover Complex**

Jun-Li Wang\*<sup>a</sup>, Hang-Yue Zhou<sup>a</sup>, Liang Zhao<sup>b</sup>, Yin-Shan Meng<sup>b</sup>, and Tao Liu<sup>b</sup>

*<sup>a</sup>School of Chemistry and Materials Engineering, Xinxiang University, 191 Jinsui Rd.,  
453003 Xinxiang (China)*

*<sup>b</sup>State Key Laboratory of Fine Chemicals, Dalian University of Technology, 2  
Linggong Road, Dalian 116024, China.*

Correspondence and requests for materials should be addressed to Jun-Li Wang  
(wangjunli@xxu.edu.cn)

**Table S1. Crystallographic Data for [Fe<sub>2</sub>L<sub>5</sub>(NCS)<sub>4</sub>] $\cdot$ 2DMF $\cdot$ 2H<sub>2</sub>O at 292 and 90 K**

| Temperature, K                                                                            | <b>292</b>                                                                                         | <b>90</b>                                                                                     |
|-------------------------------------------------------------------------------------------|----------------------------------------------------------------------------------------------------|-----------------------------------------------------------------------------------------------|
| formula                                                                                   | C <sub>300</sub> H <sub>266</sub> Fe <sub>8</sub> N <sub>104</sub> O <sub>13</sub> S <sub>16</sub> | C <sub>75</sub> H <sub>68</sub> Fe <sub>2</sub> N <sub>26</sub> O <sub>4</sub> S <sub>4</sub> |
| Fw                                                                                        | 6495.91                                                                                            | 1637.49                                                                                       |
| crystal system                                                                            | Orthorhombic                                                                                       | Orthorhombic                                                                                  |
| Space group                                                                               | <i>P</i> 2 <sub>1</sub> 2 <sub>1</sub> 2 <sub>1</sub>                                              | <i>P</i> 2 <sub>1</sub> 2 <sub>1</sub> 2 <sub>1</sub>                                         |
| <i>a</i> , Å                                                                              | 12.5490(15)                                                                                        | 12.3484(10)                                                                                   |
| <i>b</i> , Å                                                                              | 21.076(3)                                                                                          | 20.7584(16)                                                                                   |
| <i>c</i> , Å                                                                              | 30.415(4)                                                                                          | 30.015(2)                                                                                     |
| <i>V</i> , Å <sup>3</sup>                                                                 | 8044.3(17)                                                                                         | 7693.9(11)                                                                                    |
| <i>Z</i>                                                                                  | 1                                                                                                  | 4                                                                                             |
| <i>D</i> <sub>c</sub> , g/cm <sup>3</sup>                                                 | 1.341                                                                                              | 1.414                                                                                         |
| $\mu$ (Mo <i>K</i> $\alpha$ ), mm <sup>-1</sup>                                           | 0.528                                                                                              | 0.554                                                                                         |
| $\theta_{\min}$ , $\theta_{\max}$ , °                                                     | 2.004, 25.026                                                                                      | 2.035, 27.394                                                                                 |
| no. total reflns.                                                                         | 48489                                                                                              | 46847                                                                                         |
| no. uniq. reflns ( <i>R</i> <sub>int</sub> )                                              | 14185 (0.0825)                                                                                     | 16849 (0.0616)                                                                                |
| no. params                                                                                | 973                                                                                                | 1047                                                                                          |
| <i>R</i> <sub>1</sub> , <i>wR</i> <sub>2</sub> [ <i>I</i> $\geq$ 2 $\sigma$ ( <i>I</i> )] | 0.0666, 0.1601                                                                                     | 0.0966, 0.1086                                                                                |
| <i>R</i> <sub>1</sub> , <i>wR</i> <sub>2</sub> (all data)                                 | 0.1178, 0.1816                                                                                     | 0.0583, 0.1207                                                                                |
| GOF                                                                                       | 1.082                                                                                              | 1.026                                                                                         |
| CCDC                                                                                      | 1506797                                                                                            | 1506798                                                                                       |

**Table S2. Selected bond distances (Å) and angles (°) for [Fe<sub>2</sub>L<sub>5</sub>(NCS)<sub>4</sub>] $\cdot$ 2DMF $\cdot$ 2H<sub>2</sub>O at 292 K**

| Bond distances (Å)    |          |                       |          |
|-----------------------|----------|-----------------------|----------|
| Fe(1)-N(1)            | 2.094(8) | Fe(1)-N(2)            | 2.122(7) |
| Fe(1)-N(5)            | 2.138(7) | Fe(1)-N(21)           | 2.184(7) |
| Fe(1)-N(13)           | 2.191(6) | Fe(1)-N(9)            | 2.224(6) |
| Fe(2)-N(3)            | 2.104(7) | Fe(2)-N(4)            | 2.110(9) |
| Fe(2)-N(14)           | 2.158(6) | Fe(2)-N(17)           | 2.179(7) |
| Fe(2)-N(10)           | 2.206(7) | Fe(2)-N(22)           | 2.210(7) |
| Bond angles (°)       |          |                       |          |
| N(1)-Fe(1)-N(2)       | 95.0(3)  | N(1)-Fe(1)-N(5)       | 97.2(3)  |
| N(2)-Fe(1)-N(5)       | 89.6(3)  | N(1)-Fe(1)-N(21)      | 90.3(3)  |
| N(2)-Fe(1)-N(21)      | 88.1(3)  | N(5)-Fe(1)-N(21)      | 172.3(3) |
| N(1)-Fe(1)-N(13)      | 88.9(3)  | N(2)-Fe(1)-N(13)      | 175.9(3) |
| N(5)-Fe(1)-N(13)      | 88.7(3)  | N(21)-Fe(1)-N(13)     | 93.1(3)  |
| N(1)-Fe(1)-N(9)       | 174.3(3) | N(2)-Fe(1)-N(9)       | 89.6(3)  |
| N(5)-Fe(1)-N(9)       | 86.3(3)  | N(21)-Fe(1)-N(9)      | 86.4(2)  |
| N(13)-Fe(1)-N(9)      | 86.6(2)  | N(3)-Fe(2)-N(4)       | 92.7(3)  |
| N(3)-Fe(2)-N(14)      | 176.4(2) | N(4)-Fe(2)-N(14)      | 89.1(3)  |
| N(3)-Fe(2)-N(17)      | 95.4(3)  | N(4)-Fe(2)-N(17)      | 92.0(3)  |
| N(14)-Fe(2)-N(17)     | 87.6(3)  | N(3)-Fe(2)-N(10)      | 91.6(3)  |
| N(4)-Fe(2)-N(10)      | 175.7(3) | N(14)-Fe(2)-N(10)     | 86.6(2)  |
| N(17)-Fe(2)-N(10)     | 87.4(3)  | N(3)-Fe(2)-N(22)      | 87.3(3)  |
| N(4)-Fe(2)-N(22)      | 91.1(3)  | N(14)-Fe(2)-N(22)     | 89.5(3)  |
| N(17)-Fe(2)-N(22)     | 175.7(3) | N(10)-Fe(2)-N(22)     | 89.2(3)  |
| $\Sigma_{\text{Fe1}}$ | 31.4     | $\Sigma_{\text{Fe2}}$ | 26.1     |

**Table S3. Selected bond distances (Å) and angles (°) for [Fe<sub>2</sub>L<sub>5</sub>(NCS)<sub>4</sub>].2DMF.2H<sub>2</sub>O at 90 K**

| Bond distances (Å) |            |                   |            |
|--------------------|------------|-------------------|------------|
| Fe(1)-N(1)         | 1.971(5)   | Fe(1)-N(9)        | 1.992(4)   |
| Fe(1)-N(2)         | 1.968(5)   | Fe(1)-N(13)       | 2.005(4)   |
| Fe(1)-N(5)         | 1.998(4)   | Fe(1)-N(21)       | 1.968(4)   |
| Fe(2)-N(3)         | 1.979(5)   | Fe(2)-N(14)       | 2.006(5)   |
| Fe(2)-N(4)         | 1.967(5)   | Fe(2)-N(17)       | 2.006(5)   |
| Fe(2)-N(10)        | 1.996(4)   | Fe(2)-N(22)       | 1.992(4)   |
| Bond angles (°)    |            |                   |            |
| N(2)-Fe(1)-N(21)   | 89.46(19)  | N(2)-Fe(1)-N(1)   | 89.71(19)  |
| N(21)-Fe(1)-N(1)   | 178.54(18) | N(2)-Fe(1)-N(9)   | 89.46(17)  |
| N(21)-Fe(1)-N(9)   | 91.42(18)  | N(1)-Fe(1)-N(9)   | 87.37(19)  |
| N(2)-Fe(1)-N(5)    | 90.70(18)  | N(21)-Fe(1)-N(5)  | 88.66(18)  |
| N(1)-Fe(1)-N(5)    | 92.56(19)  | N(9)-Fe(1)-N(5)   | 179.8(2)   |
| N(2)-Fe(1)-N(13)   | 178.7(2)   | N(21)-Fe(1)-N(13) | 89.25(18)  |
| N(1)-Fe(1)-N(13)   | 91.58(18)  | N(9)-Fe(1)-N(13)  | 90.24(17)  |
| N(5)-Fe(1)-N(13)   | 89.60(16)  | N(4)-Fe(2)-N(3)   | 90.13(19)  |
| N(4)-Fe(2)-N(22)   | 89.79(18)  | N(3)-Fe(2)-N(22)  | 179.6(2)   |
| N(4)-Fe(2)-N(10)   | 89.57(19)  | N(3)-Fe(2)-N(10)  | 88.22(19)  |
| N(22)-Fe(2)-N(10)  | 92.18(17)  | N(4)-Fe(2)-N(14)  | 177.97(18) |
| N(3)-Fe(2)-N(14)   | 90.81(18)  | N(22)-Fe(2)-N(14) | 89.28(17)  |
| N(10)-Fe(2)-N(14)  | 88.67(17)  | N(4)-Fe(2)-N(17)  | 93.02(19)  |
| N(3)-Fe(2)-N(17)   | 89.00(18)  | N(22)-Fe(2)-N(17) | 90.61(17)  |
| N(10)-Fe(2)-N(17)  | 176.20(19) | N(14)-Fe(2)-N(17) | 88.78(18)  |
| Σ <sub>Fe1</sub>   | 12.99      | Σ <sub>Fe2</sub>  | 13.44      |

**Table S4. Intramolecular and intermolecular H-bonds in 1 at 292 K**

| Type  | D-H...A        | D-H (Å) | H...A (Å) | D...A (Å) | D-H...A (°) | Symmetry codes |
|-------|----------------|---------|-----------|-----------|-------------|----------------|
| Inter | O1W-H1WA...N6  | 0.8500  | 2.2300    | 2.951(16) | 142.00      |                |
| Inter | O1W-H1WB...N18 | 0.8500  | 2.1900    | 3.030(16) | 169.00      |                |
| Inter | C7-H7...O2     | 0.9300  | 2.3500    | 3.17(2)   | 146.00      |                |
| Inter | C19-H19...O1   | 0.9300  | 2.2600    | 3.172(13) | 165.00      | 1_655          |
| Inter | C20-H20...S1   | 0.9300  | 2.8600    | 3.788(9)  | 173.00      | 4_645          |
| Inter | C21-H21...O1   | 0.9300  | 2.3300    | 3.239(16) | 167.00      | 1_655          |
| Inter | C27-H27...O1W  | 0.9300  | 2.5700    | 3.473(16) | 164.00      | 3_565          |
| Inter | C33-H33...S3   | 0.9300  | 2.7200    | 3.647(9)  | 174.00      | 4_655          |
| Intra | C37-H37...N16  | 0.9300  | 2.1600    | 2.828(8)  | 128.00      |                |
| Intra | C50-H50...N20  | 0.9300  | 2.3200    | 2.960(9)  | 126.00      |                |
| Intra | C63-H63...N24  | 0.9300  | 2.1900    | 2.87(3)   | 129.00      |                |
| Inter | C66-H66...S3   | 0.9300  | 2.7700    | 3.620(15) | 152.00      | 3_566          |
| Intra | C71-H71C...O1  | 0.9600  | 2.3000    | 2.71(2)   | 105.00      |                |
| Intra | C75-H75C...O2  | 0.9600  | 2.2200    | 2.62(3)   | 104.00      |                |

Symmetry codes: [4655] = 1-x,1/2+y,1/2-z; [4645] = 1-x,-1/2+y,1/2-z; [1655] = 1+x,y,z; [3566] = 1/2+x,3/2-y,1-z; [3565] = 1/2+x,3/2-y,-z.

**Table S5. Intramolecular and intermolecular H-bonds in 1 at 90 K**

| Type  | D-H...A        | D-H (Å) | H...A (Å) | D...A (Å) | D-H...A (°) | Symmetry codes |
|-------|----------------|---------|-----------|-----------|-------------|----------------|
| Inter | O2W-H2WA...S4  | 0.8400  | 2.7200    | 3.550(6)  | 169.00      |                |
| Inter | O1W-H1WA...N18 | 0.8700  | 2.1200    | 2.880(6)  | 146.00      |                |
| Inter | O1W-H1WB...N6  | 0.8700  | 2.0600    | 2.925(6)  | 171.00      |                |
| Inter | O2W-H2WB...S3  | 0.8900  | 2.5400    | 3.425(6)  | 172.00      |                |
| Intra | C16-H16...N8   | 0.9500  | 2.3400    | 2.972(8)  | 123.00      |                |
| Inter | C19-H19...O2W  | 0.9500  | 2.2900    | 3.224(8)  | 167.00      |                |
| Inter | C20-H20...O2W  | 0.9500  | 2.5300    | 3.455(9)  | 166.00      |                |
| Inter | C26-H26...S1   | 0.9500  | 2.8200    | 3.632(4)  | 144.00      | 3_565          |
| Inter | C27-H27...S2   | 0.9500  | 2.7300    | 3.651(5)  | 163.00      | 3_565          |
| Intra | C29-H29...N12  | 0.9500  | 2.1100    | 2.819(7)  | 130.00      |                |
| Inter | C31-H31...S4   | 0.9500  | 2.8200    | 3.770(6)  | 179.00      | 4_755          |
| Inter | C32-H32...O1   | 0.9500  | 2.1900    | 3.122(6)  | 166.00      | 1_655          |
| Inter | C33-H33...O1   | 0.9500  | 2.2900    | 3.235(7)  | 170.00      | 1_655          |
| Inter | C39-H39...O1W  | 0.9500  | 2.5000    | 3.410(8)  | 161.00      | 3_566          |
| Inter | C44-H44...O2   | 0.9500  | 2.2700    | 3.083(8)  | 143.00      |                |
| Inter | C46-H46...O2   | 0.9500  | 2.5500    | 3.490(9)  | 170.00      |                |
| Inter | C55-H55...O2   | 0.9500  | 2.5600    | 3.506(9)  | 171.00      |                |
| Inter | C58-H58...S1   | 0.9500  | 2.6100    | 3.554(6)  | 173.00      | 4_745          |
| Intra | C68-H68...N24  | 0.9500  | 2.2000    | 2.847(7)  | 125.00      |                |
| Intra | C71-H71A...O1  | 0.9800  | 2.3900    | 2.778(8)  | 103.00      |                |
| Inter | C72-H72B...O1W | 0.9800  | 2.5400    | 3.507(8)  | 169.00      |                |
| Intra | C74-H74A...O2  | 0.9800  | 2.3900    | 2.791(9)  | 104.00      |                |

Symmetry codes: [1655] = 1+x,y,z; [4755] = 2-x,1/2+y,1/2-z; [4745] = 2-x,-1/2+y,1/2-z; [3565] = 1/2+x,3/2-y,-z; [3566.00] = 1/2+x,3/2-y,1-z.

**Table S6. Intermolecular  $\pi$  -  $\pi$  stacking in 1 at 292 K and 90 K**

| T(K) | Moiety 1            | Moiety 2                | d (Å)    |
|------|---------------------|-------------------------|----------|
| 292  | N9-N10-C20-N11-C19  | C48-C49-C54-C55-C56-C57 | 3.739(4) |
| 90   | N13-N14-C32-N15-C31 | C8-C9-C10-C11-C12-C17   | 3.631(3) |

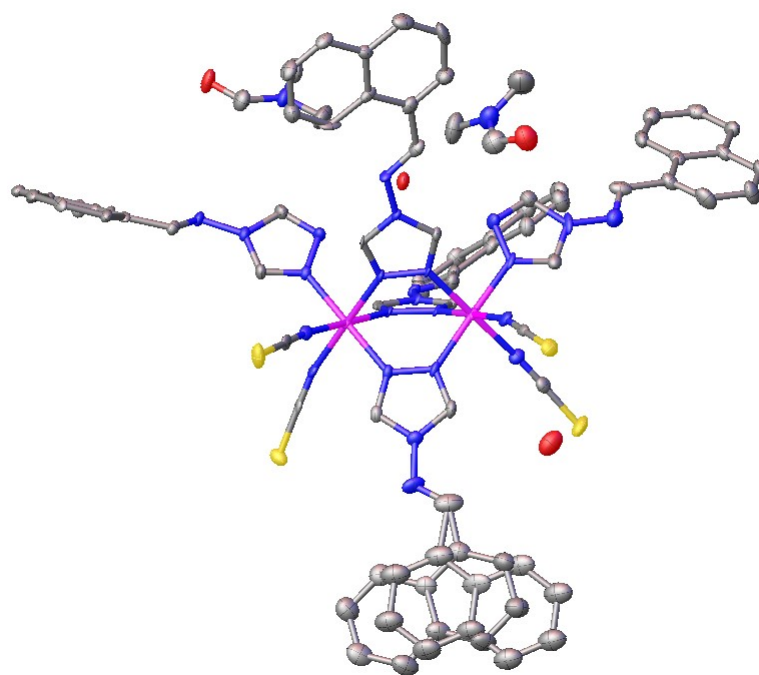

(a)

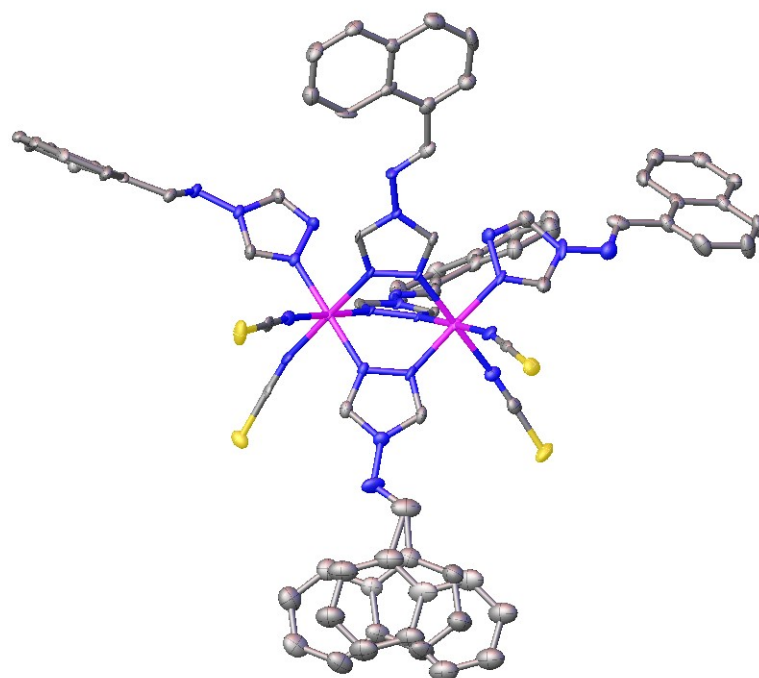

(b)

Fig. S1 ORTEP view of the crystal structure for **1** at 90 K with the 50% probability thermal ellipsoid. One naphthalene entity was disordered over two positions. (a) Hydrogen atoms are omitted for clarity. (b) H atoms, H<sub>2</sub>O, and DMF molecules have been omitted for clarity.



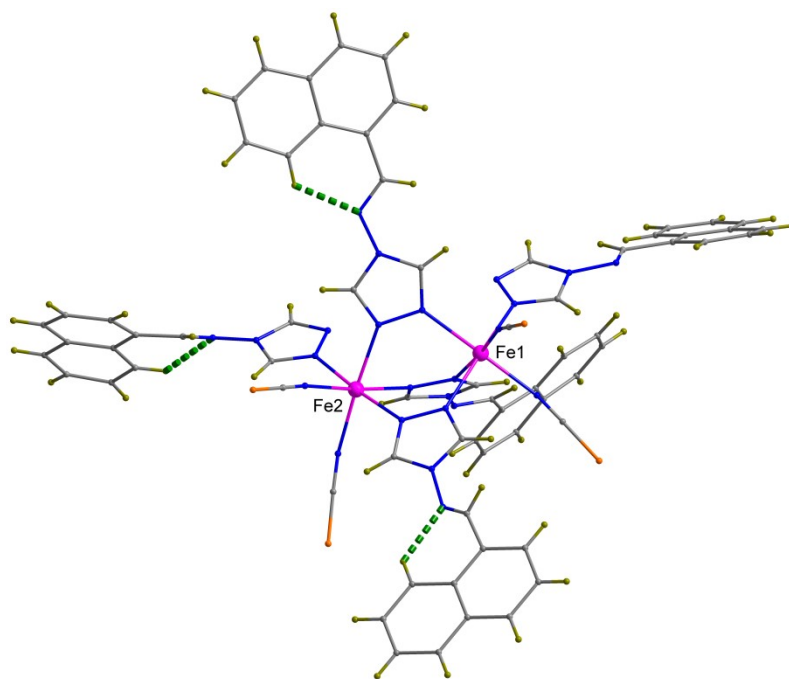

Fig. S2 Intramolecular C–H...N hydrogen bonds (green dashed lines) in **1** at 292 K.

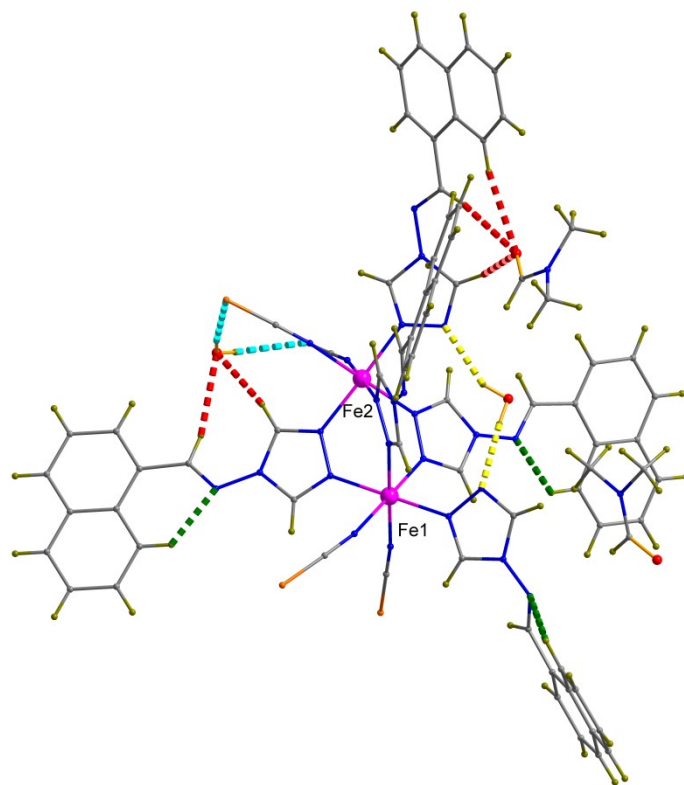

Fig. S3 Interactions of a single molecule with two H<sub>2</sub>O and one DMF molecules via intermolecular hydrogen bonds at 90 K.

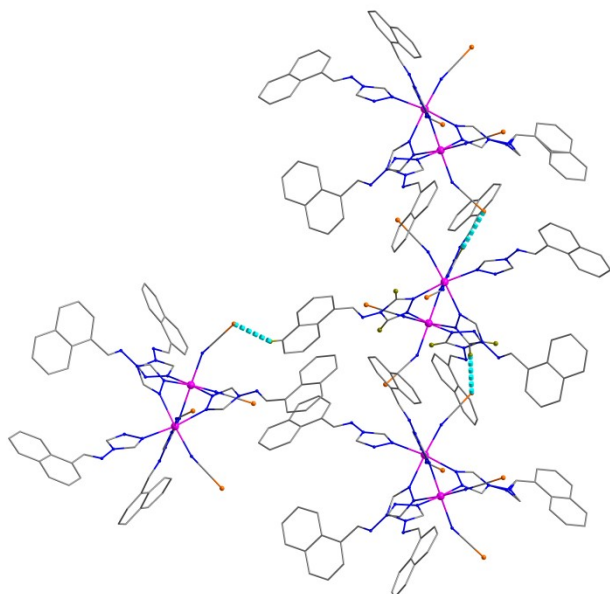

Fig. S4 One molecule connecting adjacent three molecules via three C–H...S (turquoise dashed lines) hydrogen bonds at 292 K.

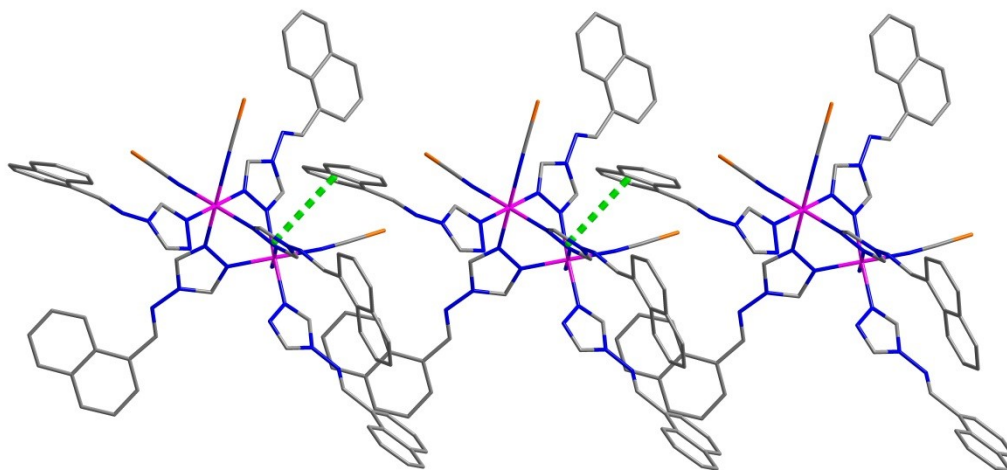

Fig. S5 Only one  $\pi$ - $\pi$  stacking interaction between triazole and naphthyl group of adjacent molecules.

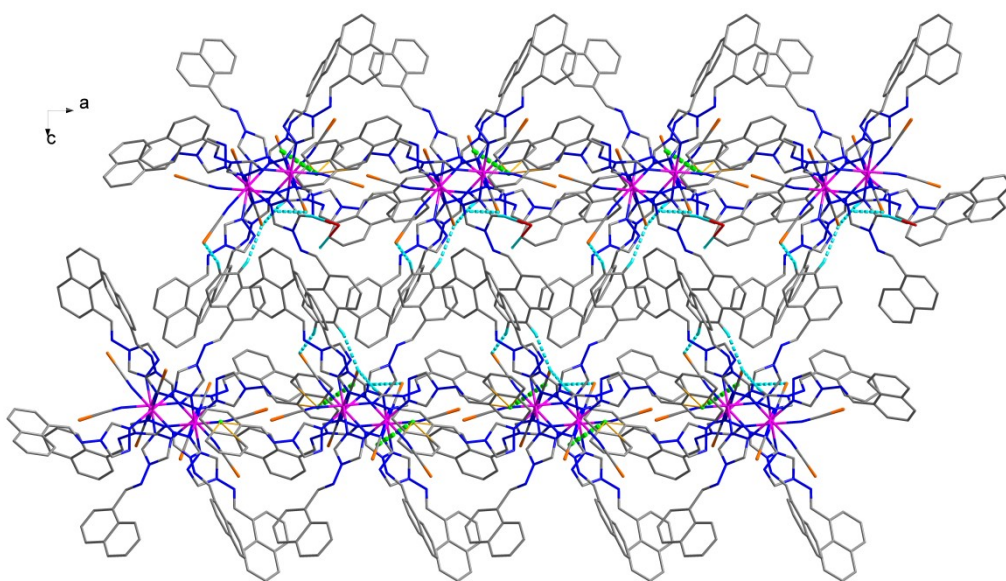

Fig. S6 Three-dimensional supramolecular network including  $\pi$ - $\pi$  stacking interactions and C-H $\cdots$ S hydrogen bonds along the b-direction.

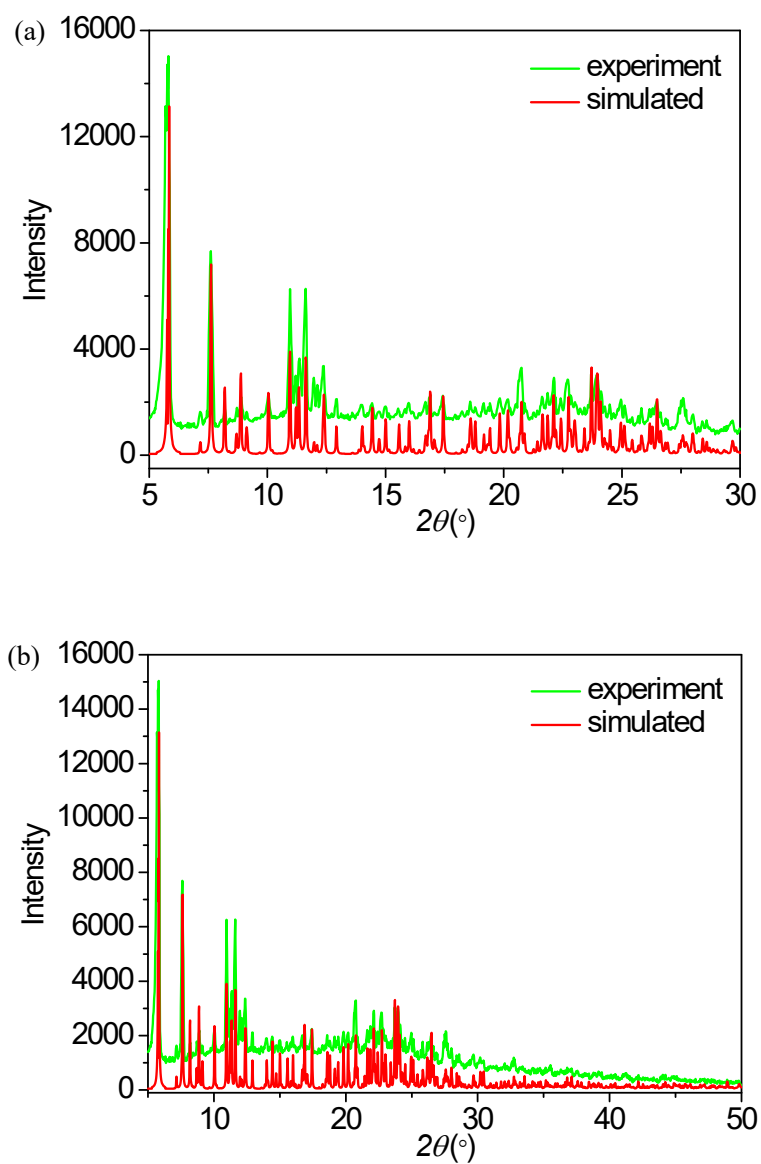

Fig. S7 Powder X-ray diffraction (PXRD) patterns of experiment (top) at room temperature and simulated (down) from the crystal structure at 292 K in the range of 5-30° (a) and 5-50° (b).

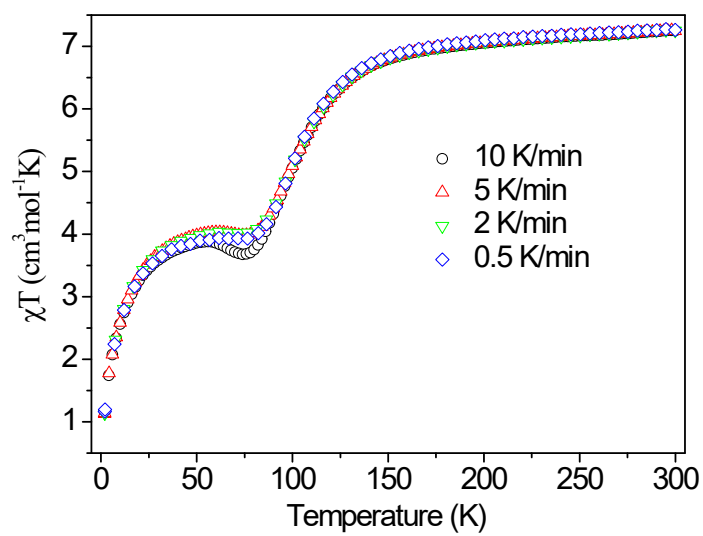

Fig. S8 Thermal evolutions of the  $\chi T$  product after TIESST effect of **1** with several heating rates.

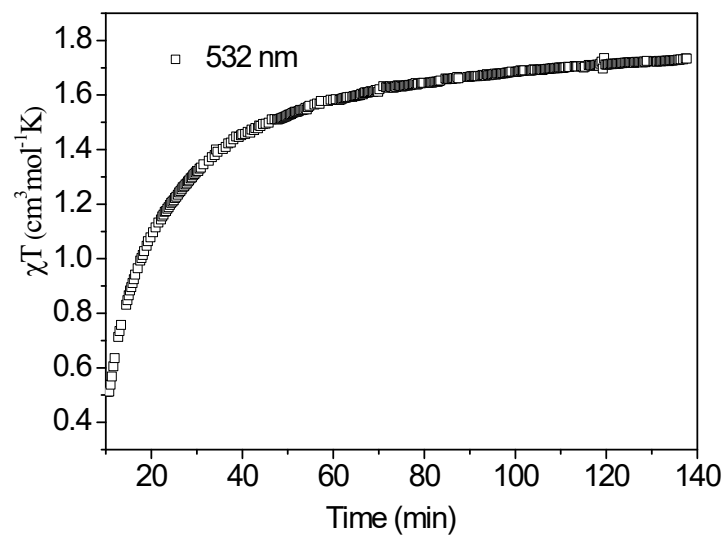

Fig. S9 Plot of  $\chi T$  vs time under 532-nm light irradiation at 10 K. The nominal laser power is 10 mW/cm<sup>2</sup>.



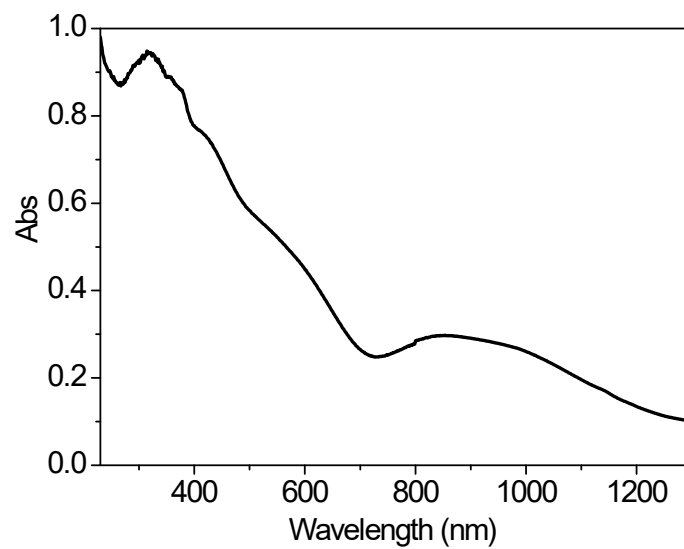

Fig. S10 UV-vis absorption spectrum of **1** at room temperature in the solid state.

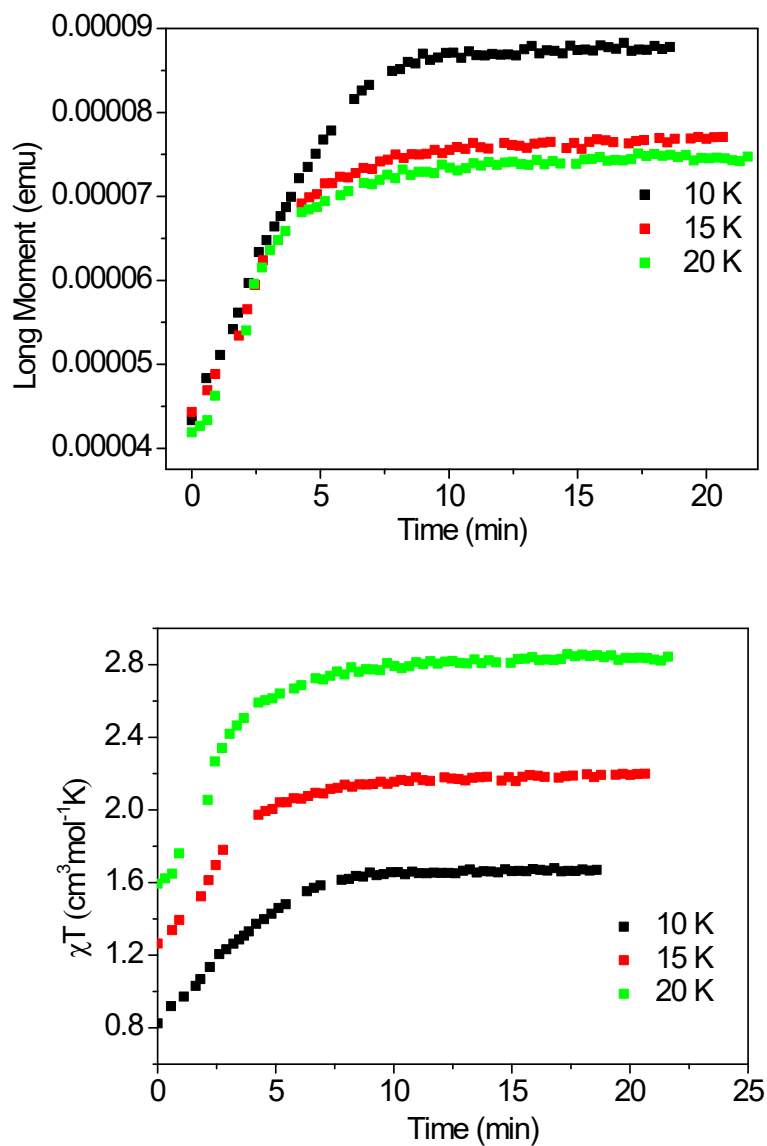

Fig. S11 Excitation curves at 10 K, 15 K and 20 K for irradiation at 532 nm with the nominal light intensity of 13 mW/cm<sup>2</sup>. The mass of the samples is 0.60 mg.

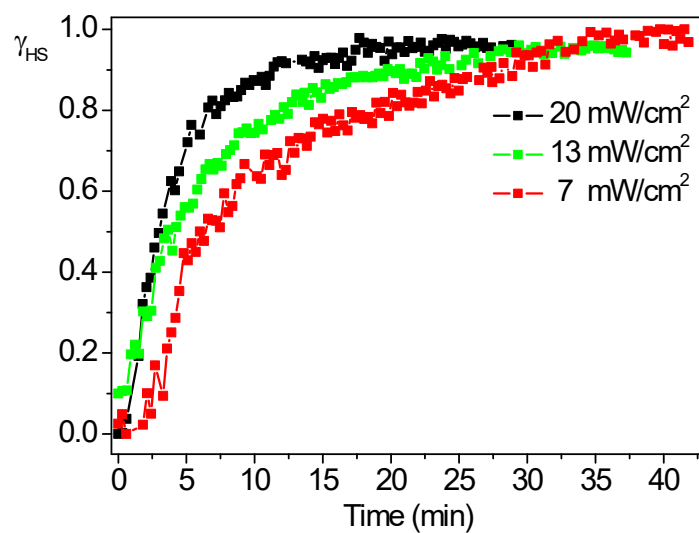

Fig. S12 Excitation curves at 10 K for irradiation at 532 nm with the nominal light intensities varying from 7 to 20 mW/cm<sup>2</sup>. The mass of the samples is 0.86 mg.

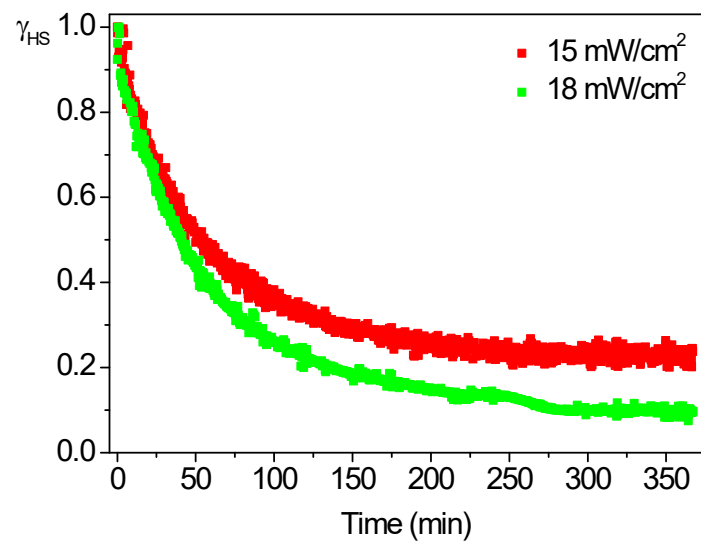

Fig. S13 Excitation curves at 10 K for irradiation at 808 nm with the nominal light intensities of 15 and 18 mW/cm<sup>2</sup>.
